# Supplementary material for: Clinical Lessons of MSC Therapy Over the Past 15 Years: A Systematic Review and Meta-Analysis
Source: Research Square preprint supplement (doi:10.21203/rs.3.rs-587655/v1), 2021-06-10
Supplement: Supplementary file 1 [file 7d96b85ed21f764ef61c46f1.docx]

**Additional file 1. The detailed search strategy**

| **Databases** | **Search strategy** | **Results** |
| --- | --- | --- |
| **PubMed** | ((MSC [title/abstract]) OR (mesenchymal stem cell [title/abstract]) OR (Wharton’s jelly [title/abstract])) AND ((safety [title/abstract]) OR (side event [title/abstract]) OR (side effect [title/abstract]) OR (adverse event [title/abstract]) OR (adverse effect [title/abstract])) | **474** |
| **Web of Science** | **467** |
| **The Cochrane Library** | **942** |
| **EMBASE** | **195** |
| **Scopus** | **0** |
